# Supplementary material for: 座談会 公社債等も損益通算・繰越控除が可能に!? 金融所得一体課税を読み解く
Source: Royal Society of Chemistry journal article supplement (doi:10.1039/c5cc05484b), 2013-07-01
Supplement: c5cc05484b1.pdf [file c5cc05484b1.pdf]

## *Supplementary Information*

### Preparation of TiO<sub>2</sub>-Supported Twinned Gold Nanoparticles by CO Treatment and Their CO Oxidation Activity

Junya Ohyama,<sup>\*,a,b</sup> Taiki Koketsu,<sup>a</sup> Yuta Yamamoto,<sup>c</sup> Shigeo Arai,<sup>c</sup> Atsushi Satsuma<sup>\*,a,</sup>  
<sup>b</sup>

<sup>a</sup> Graduate School of Engineering, Nagoya University, Nagoya 464-8603, Japan

<sup>b</sup> Elements Strategy Initiative for Catalysts and Batteries (ESICB), Kyoto University, Katsura, Kyoto  
615-8520, Japan.

<sup>c</sup> Ecotopia Science Institute, Nagoya University, Nagoya, 464-8603, Japan

## Experimental

**Materials.** TiO<sub>2</sub> (JRC-TIO-8) was provided by the Catalysis Society of Japan. HAuCl<sub>4</sub> and NaOH were purchased from Kishida Chemical Co., Ltd.

**Catalyst preparation.** Au/TiO<sub>2</sub> was prepared by a precipitation deposition method. To a suspension of TiO<sub>2</sub> (0.297 g, after calcination at 400 °C under air for 3 h) in HAuCl<sub>4</sub> aq. (1.03 mM, 20 mL) was added NaOH aq. (0.10 M) to adjust the pH to 7.0 at room temperature. The suspension was warmed at 343 K under stirring for 1 h. The solid was separated by centrifugation and washed five times with 30 mL of distilled water. After the wash water was removed, the slurry was dried in a desiccator containing dry silica gel for 48 h at r.t.

**Catalytic reaction.** The as-prepared Au/TiO<sub>2</sub> (10 mg) in a fixed-bed flow reactor (a Pyrex glass tube) was treated under a flow of 4%CO/Ar with a flow rate of 10 mL min<sup>-1</sup> for 30 min to prepare Au/TiO<sub>2</sub>-CO. In the case of Au/TiO<sub>2</sub>-H, the as-prepared Au/TiO<sub>2</sub> (10 mg) was treated under a H<sub>2</sub> flow (100%H<sub>2</sub>) at 200 °C. For comparison, Au/TiO<sub>2</sub> was also treated under a gas flow consisting of H<sub>2</sub> (3%) and CO (0.4%) at 200 °C (Au/TiO<sub>2</sub>-H+CO). After the treatments and following gas replacement with Ar, catalytic test was conducted in the reactor under a flow of 0.4%CO/10%O<sub>2</sub>/Ar with a total flow rate of 100 mL min<sup>-1</sup>. The reaction temperature was increased stepwise from r.t. to 100 °C. At each temperature, the steady state CO conversion was measured using nondispersive infrared (NDIR) CO/CO<sub>2</sub> analyzer (Horiba VIA510). The CO conversion was calculated by CO<sub>2</sub>/(CO+CO<sub>2</sub>). The sum of CO and CO<sub>2</sub> concentration was constant during the reaction over all of the catalysts. The mass balance, (generated CO<sub>2</sub>)/(converted CO), was 100%.

**UV-vis spectroscopy.** Diffuse reflectance UV-vis spectra were collected by a JASCO V-670 spectrometer equipped with an integral sphere. BaSO<sub>4</sub> was used as a standard reflection sample. The spectra were transformed with the Kubelka-Munk function.

**STEM observation.** STEM samples were prepared by depositing drops of methanol suspensions of the catalysts on carbon-coated Cu grids (Okenshoji Co. Ltd.). HAADF STEM images were obtained on a JEOL-ARM200F operated at 200 kV (magnification: 5 M with 2048 × 2048 pixels or at 10 M with 1024 × 1024 pixels (these give an identical length per pixel ratio)). The electron dose was ca. 1.0 × 10<sup>4</sup> e Å<sup>-2</sup>.

**XAFS spectroscopy.** Au L<sub>3</sub> edge XAFS measurement was carried out on the BL01B1 beamline of SPring-8 with a Si(111) two-crystal monochromator (8 GeV, 100 mA). The XAFS spectra of the Au catalysts were recorded in fluorescence mode using a Lytle detector with a Ga filter. Data reduction

was performed using the program Athena ver. 0.9.21.included in the Demeter package.<sup>1</sup> The  $k^3$  weighted EXAFS oscillation in the range of 3-11  $\text{\AA}^{-1}$  was Fourier-transformed.

**Inductively coupled plasma (ICP) spectroscopy.** The loading of Au was determined by inductively coupled plasma spectroscopy using a Thermo IRIS Intrepid II (Thermo Electron Corp.).

**Measurement of surface area.** The specific surface areas of the samples before the reaction were determined by  $\text{N}_2$  adsorption at liquid  $\text{N}_2$  temperature using a conventional flow-type adsorption apparatus based on the Brunauer-Emmett-Teller (BET) method.

**X-ray diffraction (XRD).** XRD patterns of the samples before the reaction were recorded on a Rigaku MiniFlex II/AP diffractometer with  $\text{Cu } K\alpha$  radiation.

**X-ray photoelectron spectroscopy (XPS).** The XPS of the samples before the reaction were obtained on a JPS-9000MC system (JEOL Ltd.) using  $\text{Al } K\alpha$  radiation. The energy was corrected by referencing the C1s peak to 285.0 eV.

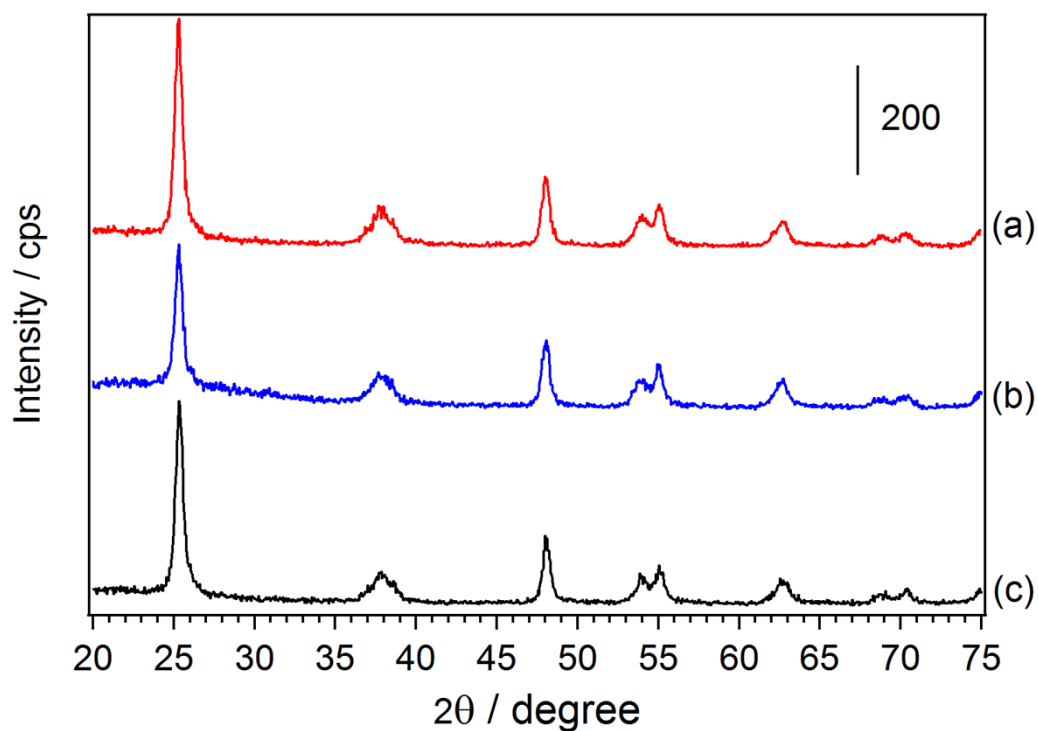

**Fig. S1.** XRD patterns of (a) Au/TiO<sub>2</sub>-CO, (b) Au/TiO<sub>2</sub>-H, and (c) TiO<sub>2</sub>. All of the samples showed an identical pattern of TiO<sub>2</sub> with anatase phase.

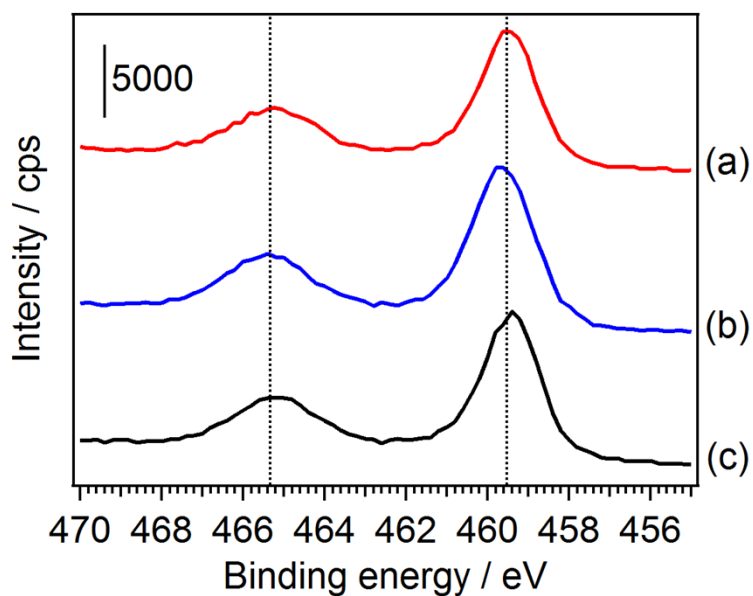

**Fig. S2.** Ti 2p XPS of (a) Au/TiO<sub>2</sub>-CO, (b) Au/TiO<sub>2</sub>-H, and (c) TiO<sub>2</sub> (JRC-TIO8 after calcination at 400°C without Au) as a reference. The energies of Ti 2p peaks did not change by the deposition of AuNPs on TiO<sub>2</sub>. Therefore, the surface chemical state of TiO<sub>2</sub> showed little change by the preparation.

### EXAFS analysis

The Au L<sub>3</sub> edge EXAFS spectra were analyzed to obtain structural parameters as shown in Table S1. The atomic distance of Au-Au (*r*) of Au/TiO<sub>2</sub>-CO was larger than Au/TiO<sub>2</sub>-H<sub>2</sub>. The large *r* of Au/TiO<sub>2</sub>-CO might be due to multiple twinned structures as well as due to the larger size of AuNPs. Au/TiO<sub>2</sub>-CO also showed the larger coordination number of Au-Au (CN) compared with Au/TiO<sub>2</sub>-H, indicating the larger AuNPs of Au/TiO<sub>2</sub>-CO than those of Au/TiO<sub>2</sub>-H. The result is consistent with the STEM analysis (Fig. ).

**Table S1.** Structural parameters determined by the curve fitting analysis of the Au L<sub>3</sub> edge EXAFS spectra of Au/TiO<sub>2</sub>-CO and Au/TiO<sub>2</sub>-H.<sup>a</sup>

| Catalyst                            | <i>r</i> <sup>b</sup> / Å | CN <sup>c</sup> | DW <sup>d</sup> / Å <sup>-2</sup> | R factor <sup>e</sup> |
|-------------------------------------|---------------------------|-----------------|-----------------------------------|-----------------------|
| Au/TiO <sub>2</sub> -CO             | 2.816(7)                  | 3.2(4)          | 0.011(1)                          | 0.00418               |
| Au/TiO <sub>2</sub> -H <sub>2</sub> | 2.721(7)                  | 1.6(2)          | 0.009(1)                          | 0.00504               |

<sup>a</sup> Curve fitting range: *k* = 3-11 Å<sup>-1</sup>, *r* = 2.0-3.3 Å. <sup>b</sup> Atomic distance of Au-Au. <sup>c</sup> Coordination number of Au-Au. <sup>d</sup> Debye-Waller factor. <sup>e</sup> R factor.

### Another TiO<sub>2</sub> supported AuNPs

A JRC-TIO4 (equivalent to P25) supported Au catalyst was prepared by the same procedure as above, and treated by CO at r.t. (Au/JRC-TIO4-CO) and H<sub>2</sub> at 200°C (Au/JRC-TIO4-H). By using the catalysts, the CO oxidation was conducted at r.t. The CO conversion over Au/JRC-TIO4-CO (95%) was higher than that of Au/JRC-TIO4-H (78%). Therefore, as is the case with JRC-TIO-8, the CO reduction treatment at r.t. enhanced the CO oxidation activity compared to the H<sub>2</sub> reduction at 200°C.

### Treatment of Au/TiO<sub>2</sub> under a mixed gas of H<sub>2</sub> and CO

The effect of CO as a reductant was further investigated by using Au/TiO<sub>2</sub> treated under a mixed gas of H<sub>2</sub> and CO at 200°C (Au/TiO<sub>2</sub>-H+CO). Au/TiO<sub>2</sub>-H+CO showed higher catalytic activity for CO oxidation at r.t. (CO conversion of 76%) compared with Au/TiO<sub>2</sub>-H (CO conversion of 37%). It is possible that CO leads the formation of twinned AuNPs to enhance the catalytic activity.

### Comparison of the Turnover frequency (TOF) with the previous literatures

To calculate the TOF on Au/TiO<sub>2</sub>-CO, the CO oxidation reaction was carried out at 3°C, because the CO conversion at r.t. is ca. 80%, where the diffusion limitation of the reactant (CO) largely

contributes the reaction rate. The CO conversion over Au/TiO<sub>2</sub>-CO at 3°C was 50%. Table S2 lists the TOFs of Au/TiO<sub>2</sub>-CO at 3°C together with the TOFs of Au/TiO<sub>2</sub> catalysts in the literatures.<sup>2-4</sup> The TOF was higher than those reported previously. It is suggested that the CO treatment is effective to enhance the CO oxidation activity in comparison with the conventional treatment methods.

**Table S2.** TOF of CO oxidation over Au/TiO<sub>2</sub>-CO together with the TOFs of Au/TiO<sub>2</sub> in the literatures.<sup>2-4</sup>

| TOF               | Reaction temperature (°C) | Ref.                                     |
|-------------------|---------------------------|------------------------------------------|
| 0.58 <sup>a</sup> | 3                         | This study                               |
| < 0.15            | 0                         | <i>J. Catal.</i> <b>1993</b> , 144, 175. |
| <0.16             | 5                         | <i>J. Catal.</i> <b>2004</b> , 222, 357. |
| < 0.06            | 0                         | <i>J. Catal.</i> <b>2006</b> , 241, 56.  |

<sup>a</sup> The TOF (number of CO molecules converted per number of surface atom of AuNPs per second) was calculated on the assumption of hemispherical structure of AuNPs.

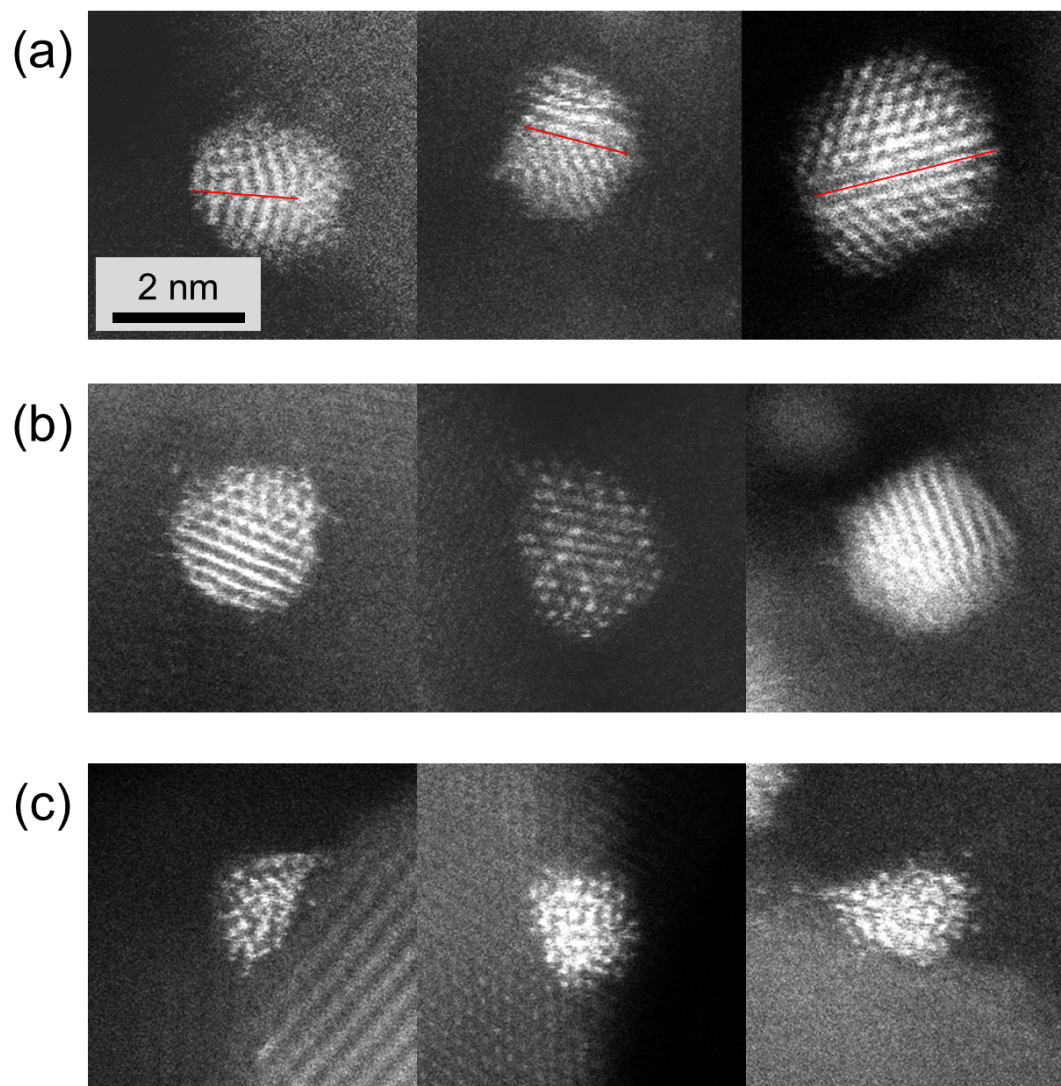

**Fig. S3.** Atomic resolution HAADF STEM images of (a) T-AuNPs, (b) S-AuNPs, and (c) A/U-AuNPs. The red lines on (a) indicates apparent twin boundaries.

### Stability of Au/TiO<sub>2</sub>-CO

The CO oxidation reaction over Au/TiO<sub>2</sub>-CO was carried out at r.t. for 10 h as shown in Fig. S4. The CO conversion decreased fast in early times (by 4% at 0.5 h), and then slowly (by 9% at 10 h). On the other hand, the STEM analysis of Au/TiO<sub>2</sub>-CO after 0.5 h did not show significant changes in the particle size by the reaction (Figs. 3 and S5) and the crystal structure of AuNPs (Fig. S6). The feature of the time course of the CO conversion (Fig. S4) was similar to the literature.<sup>5</sup> The decrease in the CO conversion might be due to the surface carbonate formation on the catalyst, rather than the change in the structure of AuNPs.<sup>5</sup>

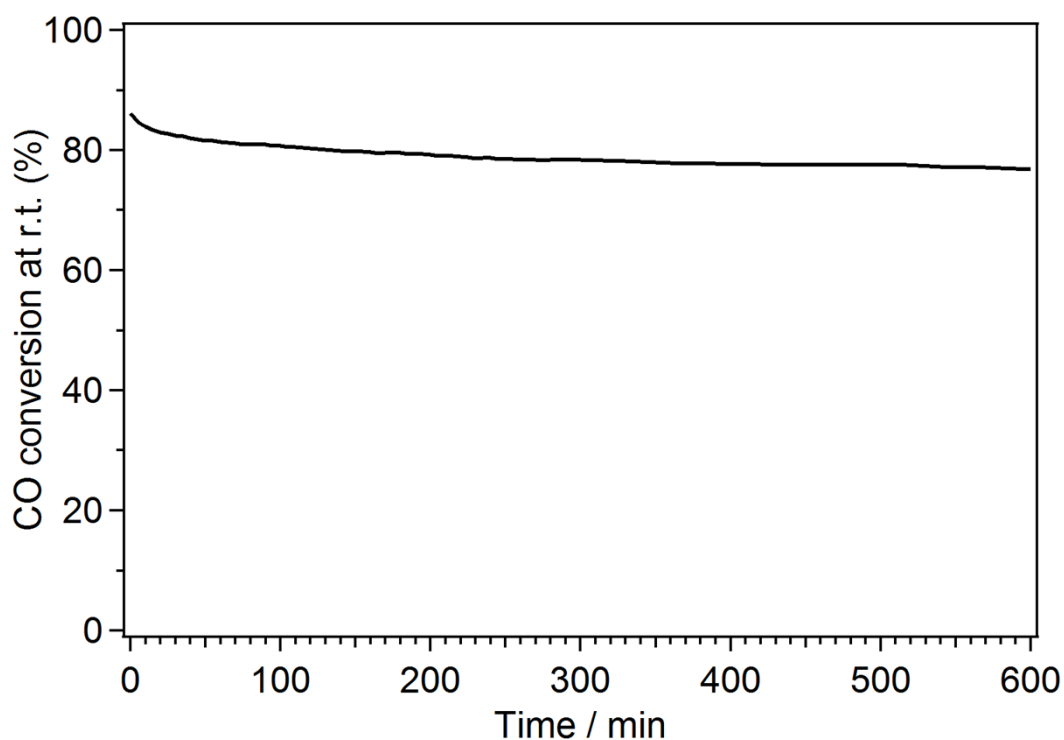

**Fig. S4.** Time course of the CO conversion on Au/TiO<sub>2</sub>-CO for 10 h.



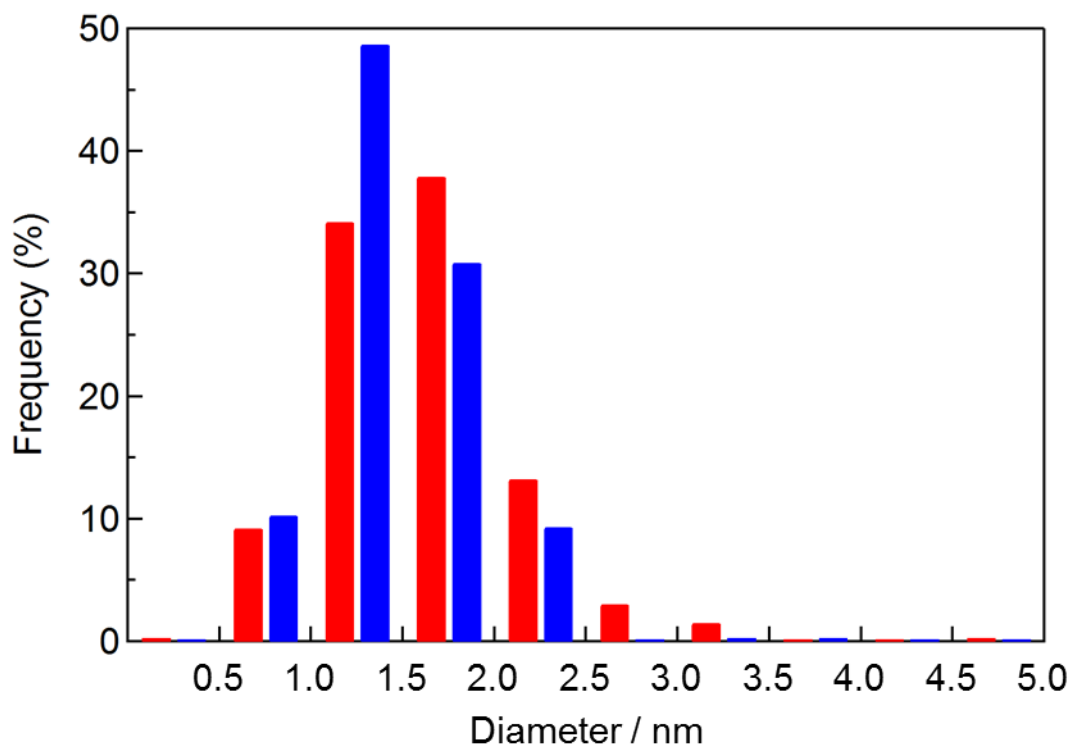

**Fig. S5.** The particle size distributions of Au/TiO<sub>2</sub>-CO and Au/TiO<sub>2</sub>-H before the CO oxidation reaction. The average particle sizes of Au/TiO<sub>2</sub>-CO and Au/TiO<sub>2</sub>-H were  $1.6 \pm 0.5$  nm and  $1.5 \pm 0.4$  nm, respectively. The sizes did not change after the reaction for 0.5 h ( $1.6 \pm 0.6$  nm and  $1.5 \pm 0.4$  nm for Au/TiO<sub>2</sub>-CO and Au/TiO<sub>2</sub>-H, respectively).

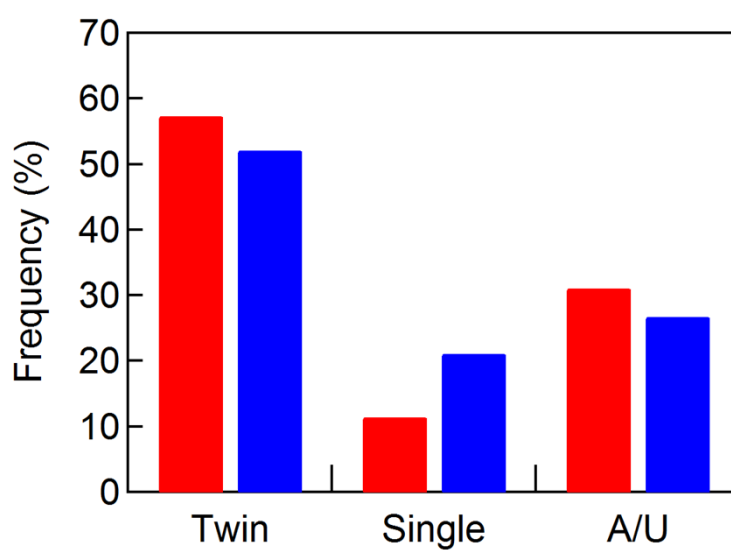

**Fig. S6.** Comparison of the crystal structure distributions of Au/TiO<sub>2</sub>-CO before (red) and after (blue) the CO oxidation reaction for 0.5 h.

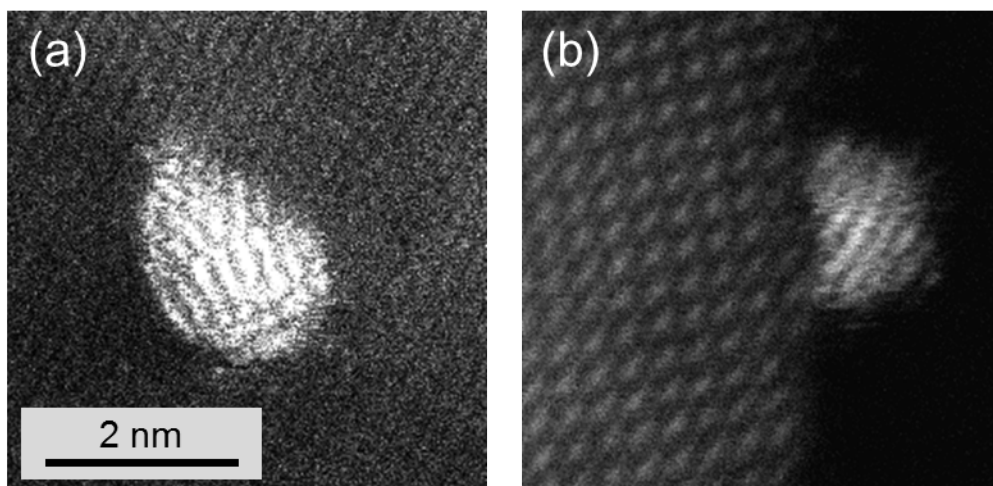

**Fig. S7.** HAADF STEM images showing half-cut (hemispherical-like) structure of AuNPs of (a) Au/TiO<sub>2</sub>-CO and (b) Au/TiO<sub>2</sub>-H.

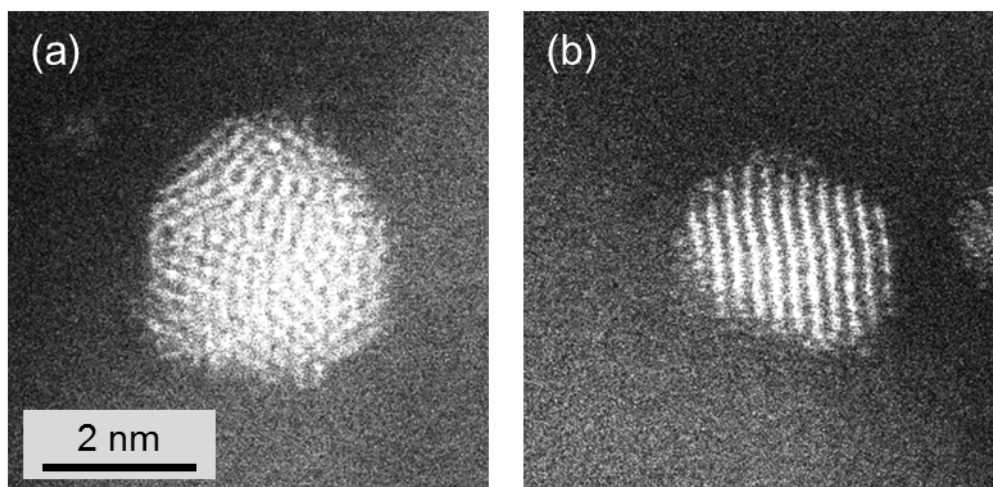

**Fig. S8.** HAADF STEM images of AuNPs showing faceted structures on (a) Au/TiO<sub>2</sub>-CO and (b) Au/TiO<sub>2</sub>-H.

### Effect of residual water on CO oxidation reaction

It is well known that water on supported Au catalysts can enhance their catalytic activity.<sup>6, 7</sup> One might consider that the higher catalytic activity of Au/TiO<sub>2</sub>-CO than Au/TiO<sub>2</sub>-H is due to the residual water on Au/TiO<sub>2</sub>-CO. Therefore, we immersed Au/TiO<sub>2</sub>-H in water, and then dried in a desiccator containing dry silica gel for 48 h. By using the resulting sample (Au/TiO<sub>2</sub>-HW), the catalytic test was conducted. However, the activity was not improved as shown in Fig. S9. The result suggests that the enhanced catalytic activity of Au/TiO<sub>2</sub>-CO is not due to the residual water.

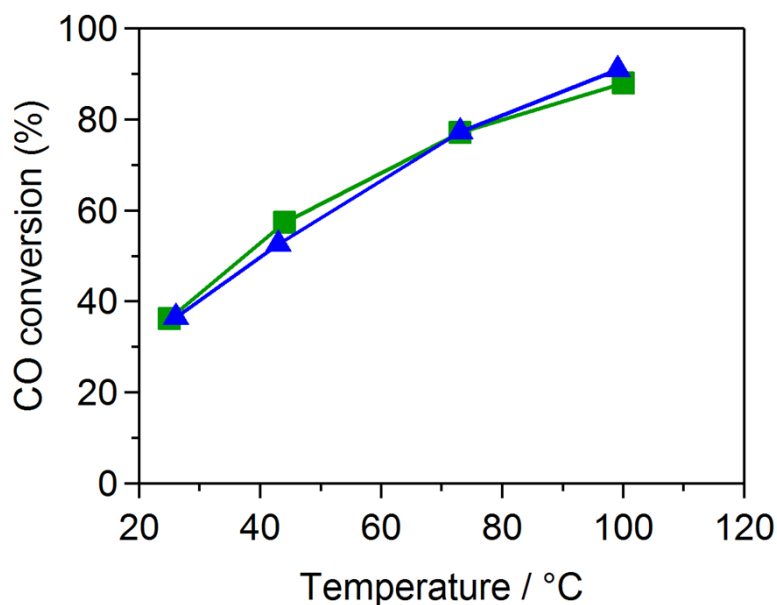

**Fig. S9.** CO conversion over Au/TiO<sub>2</sub>-HW (green) and Au/TiO<sub>2</sub>-H (blue).

### References.

1. Ravel, B; Newville, M., *J. Synchrotron Rad.*, 2005, 12, 537
2. M. Haruta, S. Tsubota, T. Kobayashi, H. Kageyama, M.J. Genet, B. Delmon, *J. Catal.*, 1993, 144, 175.
3. R. Zanella, S. Giorgio, C.H. Shin, C.R. Henry, C. Louis, *J. Catal.*, 2004, 222, 357.
4. S.H. Overbury, V. Schwartz, D.R. Mullins, W. Yan, S. Dai, *J. Catal.*, 2006, 241, 56.
5. Y. Denkwits, M. Makosh, J. Geserick, U. Hörmann, S. Selve, U. Kaiser, N. Hüsing, R.J. Behm, *Appl Catal B*, 2009, 91 470.
6. T. Fujitani and I. Nakamura, *Angew. Chem. Int. Ed.*, 2011, 50, 10144.
7. T. Takei, T. Akita, I. Nakamura, T. Fujitani, M. Okumura, K. Okazaki, J. Huang, T. Ishida, M. Haruta, C. G. Bruce and C. J. Friederike, *Adv. Catal.*, 2012, 55, 1.
